# Supplementary material for: Quinoline-derived two-photon sensitive quadrupolar probes
Source: Royal Society of Chemistry journal article supplement (doi:10.1039/c4ob01551g), 2014-01-01
Supplement: c4ob01551g1.pdf [file c4ob01551g1.pdf]

# Quinoline-Derived Two-Photon Sensitive Quadrupolar Probes

*P. Dunkel,<sup>a</sup> C. Tran,<sup>a</sup> T. Gallavardin,<sup>a</sup> H. Dhimane,<sup>a</sup> D. Ogden<sup>b</sup> and P. I. Dalko<sup>a\*</sup>*

<sup>1</sup>*Laboratoire de Chimie et Biochimie Pharmacologiques et Toxicologiques, Université Paris Descartes and*

<sup>2</sup>*Laboratoire de Physiologie Cérébrale Université Paris Descartes France.*

[peter.dalko@parisdescartes.fr](mailto:peter.dalko@parisdescartes.fr)

<sup>1</sup>H and <sup>13</sup>C NMR spectra of compounds **4a-d**, **5a-d**, **7b-h**, **8-10**, **1a-c**, **12-16** and **2a-c**
